# Supplementary material
Source: PubMed Central journal article supplement (PMC9017377)
Supplement: jb.00612-21-s0001.pdf [file jb.00612-21-s0001.pdf]

Table S1. Primers used in this study

| Primer name       | Sequence (5' - 3')                                                                         | Description                        |
|-------------------|--------------------------------------------------------------------------------------------|------------------------------------|
| mdod.fl           | ATGCCCTCGAGGGTTCGACTCTAGATTAGTGGTGGTGATGATG<br>ATGACTCATCAGCGGTCGTCAA                      |                                    |
| mdod.r1           | TCTACCACAGAGGAACATGTATGGATCGTAGACGATTTATTTAAA                                              | pHSG396-Apra-MdoD                  |
| mdod.f2           | ATAAATCGTCTACGATCCATACATGTTCTCTGTGGTAGA                                                    | construction                       |
| mdod.f2           | GTTGTAAAACGACGGCCAGTGAATTCTGTCGGTTGGCGCAAAA<br>CA                                          |                                    |
| PmdoD-RRKK-up-F   | CTATGACCATGATTACGCC                                                                        |                                    |
| PmdoD-RRKK-up-R   | CTTTAATAAATCGTTTTTTTATCCATACATGTTCTCTGTG                                                   | pHSG396-Apra-                      |
| PmdoD-RRKK-down-F | AAAAAACGATTTATTAAGGTTCAATGGCTATG                                                           | MdoD <sup>RR-KK</sup> construction |
| PmdoD-RRKK-down-R | GTAAAACGACGGCCAGTGAATTC                                                                    |                                    |
| rcsC.hb.f2        | TCTACCACAGAGGAACATGTATGCGTCAGAAAAGAGACAACG<br>GTTGTAAAACGACGGCCAGTGAATTCTTAGTGGTGGTGATGATG | pHSG396-Apra-RcsDB                 |
| rcsC.hb.r2        | ATGGTCTTTATC<br>TGCCGGACTTA                                                                | construction                       |
| AmiA-F            | CAAGCTTGCATGCCCTCGAGGGTTCGACATGTCCATTTCCGGA<br>TCG                                         |                                    |
| AmiA-R            | TAAAAAGGCGCTGAATGGCGCTTTTTTTATTTACCGCTTTCTCGA<br>GTG                                       | pHSG396-Apra-<br>AmiA/AmiC         |
| AmiC-F            | CACTCGAGAAAAGCGGTAAATAAAAAAAGCGCCATTCAGCGCCT<br>TTTTA                                      | construction                       |
| AmiC-R            | ACGGCCAGTGAATTCGAGCTCGGTACCGGCACACCCCTTG                                                   |                                    |
| res112.u1.f       | AACTGCATGAATCCCGGGAGAGCTCATTTACAGCAGCGTTTGCT<br>GC                                         |                                    |
| res112.d1.r       | TGGAGCTGCACATGAACCCATGACCTGTAAAACTTCGCG                                                    | pRE112-rcsDB                       |
| res112.u2.f       | CGCGAAGTTTTAACAGGTCATGGGTTTCATGTGCAGCTCCA                                                  | construction                       |
| res112.d2.r       | CTTATCTGGCCTACAGATGATCATGAGCTCAGCCACTGG                                                    |                                    |
| res112.u3.        | GCCAGTGGCTGAGCTCATGATCATCTGTAGGCCAGATAAGA                                                  |                                    |
| res112.d3.r       | GATCCCAAGCTTCTTCTAGAGGTACCGTGGTAAACGCTGCTGGC                                               |                                    |
| cpzar.fl          | AACTGCATGAATCCCGGGAGAGCTCTGGCGAAAATCTCTCAAC<br>CG                                          |                                    |
| cpzar.r1          | TGGAGCTGCACATGAACCCACCGCATTTGTAGGCAGGATA                                                   | pRE112-cpxAR                       |
| cpzar.f2          | ACCGCATTTGTAGGCAGGATAGGGTTTCATGTGCAGCTCCA                                                  | construction                       |
| cpzar.r2          | GTAATTTCTGCCTCGGAGGTTTCATGAGCTCAGCCACTGG                                                   |                                    |
| cpzar.f3          | CCAGTGGCTGAGCTCATGAACCTCCGAGGCAGAAATTAC                                                    |                                    |
| cpzar.r3          | GATCCCAAGCTTCTTCTAGAGGTACCGGCTTAACAGGCGATAC                                                |                                    |

## A

---

|        |                        |                 |
|--------|------------------------|-----------------|
| gapA.F | TCTACCGGTGCTGCTA       |                 |
| gapA.R | GCAGCTTTGATCTGCTC      |                 |
| fliC.F | GGCTTGCGTATTAACAGC     |                 |
| fliC.R | GTTGTTGATTTCCGGACAGC   |                 |
| fliD.F | TATGGGCTATGACGCC       |                 |
| fliD.R | CATCGTTCAGGTTTCAGG     |                 |
| kpsT.F | AGTCACCGTAGAGGCAT      |                 |
| kpsT.R | GAGATGTCTGGCATCGT      |                 |
| kpsF.F | GAACTCCACATGGCGAATG    |                 |
| kpsF.R | GGTGATAGCGCGCAAAT      |                 |
| rprA.F | ATAAGCATGGAAATCCCCTG   |                 |
| rprA.R | ATAAAAAAAAAAGCCCATCGTG | Used in RT-qPCR |
| tssB.F | CCGTAAACAAGCACAATTTCCG |                 |
| tssB.R | GCTGTCCGGTGAAAAATC     |                 |
| rcnB.F | TTTGCTGGTTACCAGTG      |                 |
| rcnB.R | ATGTTGTACTCATCGGTGC    |                 |
| flhD.F | CCTCCGAGTTGCTGAAAC     |                 |
| flhD.R | TTTGCGGAAGAGTCAGTG     |                 |
| modA.F | CTGTTTATTTCTGCCGATCAG  |                 |
| modA.R | TTTGCTGTTCGATGGTGAAATC |                 |
| motB.F | GATGATTACACCCAAAGCCA   |                 |
| motB.R | TTTCGGATCGGACTCTATCAA  |                 |

---
